# Supplementary material for: Chemical ozone loss and chlorine activation in the Antarctic winters of 2013–2020
Source: Copernicus journal article supplement (doi:10.5194/acp-24-2377-2024), 2024-02-23
Supplement: Supplementary file 1 [file acp-24-2377-2024-supplement.pdf]

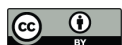

*Supplement of*

## **Chemical ozone loss and chlorine activation in the Antarctic winters of 2013–2020**

**Raina Roy et al.**

*Correspondence to:* Raina Roy (rainaroy2105@gmail.com) and Jayanarayanan Kuttippurath (jayan@coral.iitkgp.ac.in)

The copyright of individual parts of the supplement might differ from the article licence.

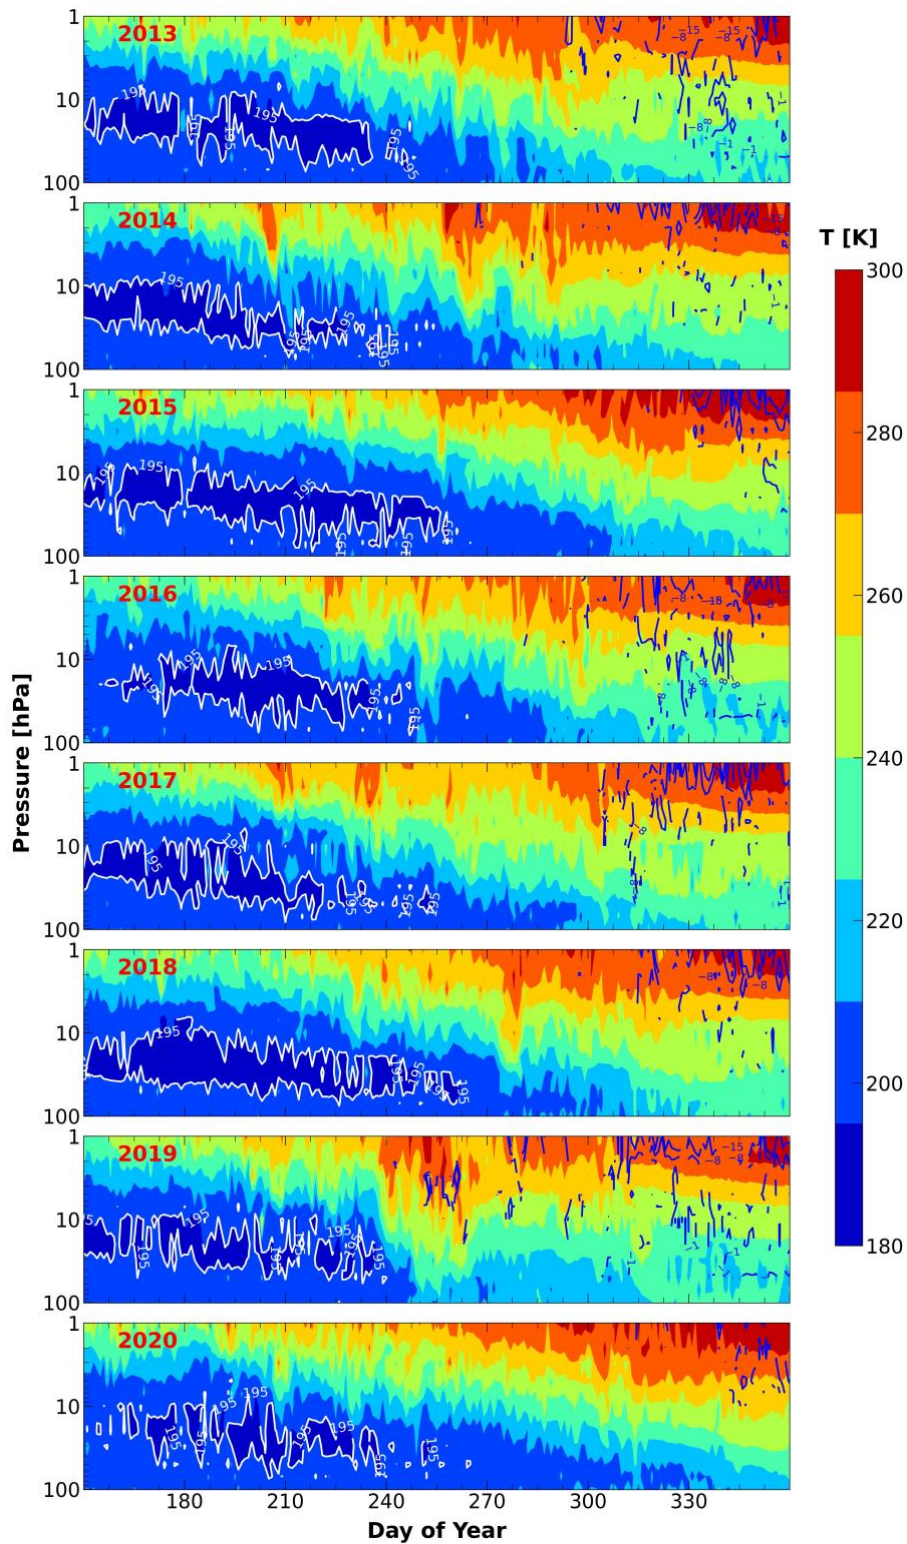

**Figure S1:** Seasonal march of the zonal mean temperature and zonal winds for the period 2003–2020 averaged inside the vortex. The white contours represent 195 K temperatures. The zonal wind easterlies are overlaid with blue lines.
